# CLINICAL REVIEW: Current Treatment of Malignant Pheochromocytoma

Tim Scholz, Graeme Eisenhofer, Karel Pacak, Henning Dralle, and Hendrik Lehnert

Department of Endocrinology and Metabolism (T.S., H.L.), Otto von Guericke University Medical School, D-39120 Magdeburg, Germany; Warwick Medical School (H.L.), University Hospital of Coventry, Coventry CV4 7AL, United Kingdom; National Institutes of Health (G.E., K.P.), Bethesda, Maryland 20892; and Department of General, Visceral, and Vascular Surgery (H.D.), Martin Luther University, D-06099 Halle/Saale, Germany

**Context:** Pheochromocytomas are rare tumors of predominantly adrenal origin that often produce and secrete catecholamines. Malignancy occurs in a variable percentage of cases depending on genetic background and tumor location. Definitive diagnosis relies on the detection of distant metastases. Treatments for malignant pheochromocytoma include surgical debulking, pharmacological control of hormone-mediated symptoms, targeted methods such as external irradiation, and systemic antineoplastic therapy. Different agents and protocols for this purpose are reviewed, and their therapeutic potential is discussed.

**Evidence Acquisition:** Literature on antineoplastic therapies for malignant pheochromocytoma was identified by searching the PubMed database with restriction to articles published in English during the past 30 yr.

**Evidence Synthesis:** Because of the rarity of the condition, no randomized clinical trials concerning the treatment of malignant pheochromocytoma have been performed.

The strategy established best is [<sup>131</sup>I]meta-iodobenzylguanidine (MIBG) therapy, which is well tolerated. Similar to cytotoxic chemotherapy with cyclophosphamide, vincristine, and dacarbazine, MIBG can induce remission for a limited period in a significant proportion of patients. Octreotide as a single agent seems to be largely ineffective.

**Conclusions:** MIBG radiotherapy and cyclophosphamide, vincristine, and dacarbazine chemotherapy are comparable with respect to response rate and toxicity. It is unclear whether combining both can improve the outcome. Future developments may include new multimodal concepts with focus on inhibition of angiogenic factors and heat shock protein 90. Any present or new therapeutic approach must take into account the highly variable natural course of the disease. (*J Clin Endocrinol Metab* 92: 1217–1225, 2007)

**P**HEOCHROMOCYTOMAS (PCCs) are tumors of chromaffin cells that produce and often secrete catecholamines. They mostly occur within the adrenal medulla but may also present as paragangliomas (PGLs) of the extraadrenal sympathetic nervous system, occurring in the chest, abdomen, or pelvis (1). Despite a comparatively high prevalence in some autopsy studies (2–4), PCCs are discovered during life in only one to six per million people/yr among the general population (5–9). Most tumors are sporadic, but about 25% of cases are associated with germline mutations in one of five major susceptibility genes (10–13). This etiological diversity is reflected by considerable variations in the biological behavior of chromaffin cell tumors (14).

The frequency of a malignant course depends strongly on the genetic background. There is a particularly high risk of malignancy for tumors caused by mutations in the gene for succinate dehydrogenase subunit B (SDHB). In a recently reported series of patients, SDHB-related PCCs were malignant in 15 of 21 cases (11). Mutations in the gene for subunit

D (SDHD), in contrast, are associated with a much lower rate of malignant PCCs (11, 15–17). Also, virtually all PCCs in multiple endocrine neoplasia (MEN) type 2, more than 90% of those in von Hippel-Lindau disease (VHL), and almost 90% of those in neurofibromatosis type 1 (NF-1) appear to be benign (11, 18–21). Although the phenotype is more aggressive in MEN type 2B than in MEN type 2A with regard to medullary thyroid carcinoma, this relation has not been proven for PCC.

Chromaffin cell tumors in MEN type 2, von Hippel-Lindau disease and neurofibromatosis type 1 have predominantly intraadrenal locations, whereas those in patients with SDHD and SDHB mutations have predominantly extraadrenal locations. However, PGLs metastasize more often than adrenal PCCs even in genetically unselected collectives (22–26). Thus, the higher prevalence of malignancy in PGL cannot be explained by an association of genetic background and tumor site alone. Extraadrenal location should therefore be recognized as an independent determinant of the risk of malignancy, although published data on this aspect are not unequivocal (27).

Several biochemical (28–30), morphological (31–34), and molecular (35–39) markers for distinguishing benign and malignant PCCs have been investigated, but none appear to reliably indicate malignant behavior. The only criterion for malignancy generally agreed upon is the presence of chromaffin tissue, unconnected with the primary tumor, at sites where chromaffin tissue is normally absent, *i.e.* the presence

First Published Online February 6, 2007

Abbreviations: CVD, Cyclophosphamide, vincristine, and dacarbazine; <sup>90</sup>Y-DOTATOC, [<sup>90</sup>Y-DOTA]-D-Phe<sup>1</sup>-Tyr<sup>3</sup>-octreotide; MEN, multiple endocrine neoplasia; MIBG, meta-iodobenzylguanidine; PCC, pheochromocytoma; PGL, paraganglioma; SDHB, succinate dehydrogenase subunit B; SRI, somatostatin receptor imaging; sst, somatostatin receptor.

JCEM is published monthly by The Endocrine Society (<http://www.endo-society.org>), the foremost professional society serving the endocrine community.

of distant metastases (40). As a consequence, the diagnosis of malignant PCC currently excludes the possibility of surgical cure. Surgical debulking is nevertheless widely regarded as a mainstay of palliative therapy despite lack of data (41). The rationale behind this approach is to reduce exposure of target organs to high levels of catecholamines and, if [ $^{131}\text{I}$ ]meta-iodobenzylguanidine (MIBG) radiotherapy (see below) is feasible, to increase the relative uptake of MIBG into the remaining lesions. It is unclear, however, whether tumor debulking is useful if catecholamine release is low and MIBG uptake is unappreciable by imaging studies.

Prognosis in cases with confirmed malignancy is difficult to predict, both for sporadic and familial PCCs. Although there is no difference in overall survival between adrenal and extraadrenal malignant PCC, the outcome worsens with increasing tumor size in both groups (23, 27). Average 5-yr survival in the presence of metastases, which typically affect the bones, liver, lungs, and lymph nodes (42, 43), is approximately 50% (25, 40). Pharmacological control of the physiological and pathological effects of excess circulating catecholamines represents a continuing requirement in the treatment of metastatic or incompletely resectable invasive PCCs.  $\alpha$ -Adrenergic receptor blockers and calcium channel antagonists often reduce hormone-mediated symptoms sufficiently, but occasionally additional treatment with  $\alpha$ -methyl paratyrosine to inhibit catecholamine synthesis is necessary (44). External irradiation and other targeted methods (such as radiofrequency ablation, cryoablation, and arterial embolization) can help to alleviate local complications (40). However, these approaches are purely for symptomatic relief. Considerable attention has therefore focused on the development of systemic antineoplastic therapies. In the following sections, we summarize the effects of different agents that have been administered for this purpose, and the question will be addressed whether or not treatment with these substances should be initiated in individual cases.

### Sources

The PubMed database was searched on March 1, 2006, for articles on the antineoplastic therapy of malignant pheochromocytoma published between January 1, 1976, and January 31, 2006. Only papers written in English were considered. The medical subject heading pheochromocytoma was used alone and in combination with the medical subject headings antineoplastic protocols, MIBG, or octreotide to identify relevant references. Independent of these categories, additional articles with particular relevance to the topic were also included.

### Preliminary Remark

Evaluation criteria for the response to antineoplastic therapy are not uniform in the reviewed studies. We use here the following common definitions (45). 1) For tumor response, a complete response reflects the disappearance of all radiological evidence of the tumor; a partial response is defined by at least a 50% decrease of the size of all tumor lesions (measured by computed tomography or magnetic resonance imaging), without reaching a complete response, and includes the absence of new lesions on computed tomography,

magnetic resonance imaging, or scintigraphic scans; and progression is defined by at least a 25% increase of the radiological size of any tumor lesion or by the visualization of at least one new lesion. 2) For biochemical response, a complete response results if all major biochemical markers used for evaluation (such as plasma or urinary catecholamines or metanephrines) have normalized; a partial response is defined by at least a 50% decrease, but not normalization, of these markers; and progression is defined by at least a 25% increase of any major biochemical marker. For measurements of catecholamines, this definition could be impacted by variable amounts of catecholamines secreted by tumors. In contrast, levels of metanephrines, which are produced independently of variations in catecholamine release and show strong positive relationships with tumor volume, should provide more accurate measures of biochemical response in terms of tumor catecholamine synthesis (*i.e.* catecholamine production) (46).

All other courses are classified as stable disease.

### Chemotherapy

Cytotoxic chemotherapy was the first antineoplastic principle employed in malignant chromaffin cell tumors. Early attempts with streptozocin in two patients with inoperable PCC were unsuccessful both biochemically and morphologically (47), whereas a partial biochemical remission and a reduction of the adrenal mass by 25% and of a hepatic metastasis by 50% was observed later in a single case (48). Streptozocin was also administered to one patient with a metastatic PGL of the organ of Zuckerkandl, resulting in a partial biochemical response, but ultimately fatal tumor progression (49). Combined chemotherapy with streptozocin, cyclophosphamide, and 5-fluorouracil resulted in a slight biochemical improvement at formally stable disease in one of two patients with metastatic PCC (50).

A new and more effective protocol was introduced in 1985 by Keiser *et al.* (51), who employed a combination of cyclophosphamide, 750 mg/m<sup>2</sup> body surface area on d 1; vincristine, 1.4 mg/m<sup>2</sup> on d 1; and dacarbazine, 600 mg/m<sup>2</sup> on d 1 and 2, with this protocol repeated every 21 d [cyclophosphamide, vincristine, and dacarbazine (CVD) scheme]. In 1988, these investigators published a nonrandomized study of 14 patients with metastatic PCC receiving this therapy (52). Two patients had a complete and six a partial tumor response with a median duration of 21 months. A biochemical response was documented in 11 patients (median duration, 22 months). Remarkably, only one patient had continuous tumor progression from the initiation of chemotherapy (which was stopped after four cycles). In this trial, cyclophosphamide and dacarbazine dosages were increased by 10% each cycle until bone marrow suppression occurred, whereas treatment delays for 1 wk or dosage reductions were made in case of hematological or neurological side effects. Toxicity was mild to moderate and included leuko- and thrombocytopenia, paresthesias, nausea, and vomiting. No serious adverse events were noted. A number of case reports have subsequently confirmed the short-term benefit and the tolerable side effects of the CVD scheme; however, relapse occurred within 2 yr in most of these patients (26, 44, 53–56).

Different chemotherapy protocols were tested in small numbers of patients. One patient displayed a reduced need of antihypertensives after cisplatin and 5-fluorouracil combination therapy (57). A male patient with a cardiac PGL histologically considered malignant because of micrometastases in adjacent lymph nodes was treated with vepeside, carboplatin, vincristine, cyclophosphamide, and adriamycin as adjuvant therapy after resection and has remained disease-free for 5 yr (58). A regimen adding anthracyclines to a modified CVD therapy was effective in a case of adrenal PCC with distant lymph node metastases (59), with continuous remission 3 yr after cessation of chemotherapy. Bone marrow suppression was the most serious side effect. Very recently, a radiological response was reported in one of three cases of metastatic PCC among 29 patients with neuroendocrine tumors treated with an oral regimen of temozolomide (median dose, 150 mg/d) and thalidomide (median dose, 100 mg/d) (60). Notable toxic effects in the whole study population included lymphocytopenia (69%), thrombocytopenia (14%), and neuropathy (38%).

In summary, the CVD scheme seems effective at modest toxicity in a significant proportion of patients (Table 1), although remissions are rather short ( $\leq 2$  yr) and are often followed by complete therapeutic failure after relapse. Data on other protocols remain limited.

### MIBG Radiotherapy

MIBG (Fig. 1), a guanethidine analog, is selectively concentrated in chromaffin storage granules due to uptake by the same mechanisms responsible for uptake and storage of catecholamines (61). The agent, however, has no affinity for adrenergic receptors. Therapeutic application of  $^{131}\text{I}$ -labeled MIBG, which acts mainly through emission of  $\beta$ -particles, was introduced in 1983 (62–64) and since then employed in numerous patients with malignant PCC (43, 54, 65–87).

Loh *et al.* (88) reviewed 116 patients treated with  $^{131}\text{I}$ MIBG before 1997, including 89 patients of whom follow-up data were available. Among the latter, death was reported in 33% of those with an initial response to MIBG after a median of 22 months after treatment and in 45% of the nonresponders after a median of 13 months. Individual doses typically ranged from 3.7–7.4 GBq and were repeatedly administered at intervals of several months. In terms of imaging

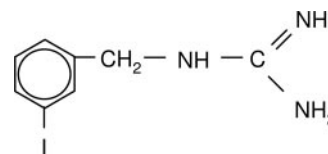

FIG. 1. Structural formula of MIBG.

(computed tomography, MIBG, or bone scintigraphy), complete or partial remission was induced in 4% and, respectively, 26% of all the 116 patients, whereas in 57%, no relevant changes were noted. Progression was evident in 13%. Biochemical data were available from 96 individuals who had complete normalization of urinary catecholamines or their metabolites in 13% of cases, partial normalization in 32%, and unchanged or increasing values in 55% of cases.

From extended analyses based on this work (89, 90), it was concluded that  $^{131}\text{I}$ MIBG therapy induces (mostly partial) tumor responses in 24–45% of the patients, among whom disease progression after approximately 2 yr is common. Toxicity is generally modest and mainly affects the bone marrow, most often with thrombocytopenia occurring within a few weeks of treatment. Myeloid leukemia as a secondary malignancy has been observed in two of 119 children treated with MIBG for neuroblastoma (91); however, no conclusive data are available on the frequency of leukemia after MIBG treatment for malignant PCC. Nausea is typical, and impaired liver and thyroid function have also been reported (90).

Preparation with sodium perchlorate or potassium iodide is necessary 2 d before and 1 wk after MIBG therapy to protect the thyroid gland (see Table 3). Also, drugs that interfere with MIBG uptake, such as labetalol, reserpine, digoxin, angiotensin converting enzyme inhibitors, various antidepressants and antipsychotics, and some sympathomimetics, should be withdrawn 3–10 d before MIBG treatment (92–95).

### High-dose therapy

Usually, multiple medium doses of  $^{131}\text{I}$ MIBG of about 200 mCi (7.4 GBq) are administered. Increased long-term survival may be achieved with higher individual doses, as suggested by Rose *et al.* in 2003 (96). Twelve patients were

TABLE 1. CVD chemotherapy for malignant PCC (selected reports)

| Publication year (ref.) | No. of patients | Biochemical response (%) |         | Tumor response (%) |         | Stable disease (%) | Progression (%) |
|-------------------------|-----------------|--------------------------|---------|--------------------|---------|--------------------|-----------------|
|                         |                 | Complete                 | Partial | Complete           | Partial |                    |                 |
| 1988 (52)               | 14              | 21                       | 57      | 14                 | 43      | 36                 | 7               |
| 1996 (55)               | 2               | 0                        | 50      | 50                 | 0       | 50                 | 0               |
| 1998 (44)               | 3               | NE                       | NE      | 0                  | 0       | 33                 | 67              |
| 1999 (86) <sup>a</sup>  | 4 <sup>b</sup>  | 0                        | 0       | 0                  | 50      | 0                  | 50              |
| 2001 (87) <sup>c</sup>  | 3               | 33                       | 0       | 0                  | 33      | 67                 | 0               |
| 2003 (26)               | 4               | ND                       | ND      | 25                 | 25      | 25 <sup>d</sup>    | 25              |
| % of evaluable cases    |                 | 20                       | 45      | 14                 | 32      | 36                 | 18              |

The best response is listed irrespective of later relapse. Stable disease and progression refer to tumor presence only. ND, No data available; NE, not evaluable due to concomitant application of  $\alpha$ -methyl tyrosine.

<sup>a</sup> Chemotherapy was initiated 3–5 months after MIBG therapy in all patients.

<sup>b</sup> Tumor response was evaluable in two patients, and biochemical response was evaluable in one patient.

<sup>c</sup> Chemotherapy was initiated 5 months after MIBG therapy in one patient.

<sup>d</sup> Complete remission of lung metastases in this patient.



treated with a median single dose of 29.6 GBq and a median cumulative dose of 37.6 GBq. Three of those patients had a complete remission, including two with soft tissue and bone metastases, and seven patients had a partial response. Median follow-up for the responders was approximately 3.5 yr. The two nonresponders and two of the patients with a partial remission died from progressive disease after approximately 1 yr. The main toxic effects were severe thrombocytopenia and neutropenia, with one patient requiring infusion of stem cells harvested routinely before high-dose treatment. Because increased hematotoxicity is an important disadvantage of high-dose compared with low- or medium-dose MIBG therapy (which might even outweigh an improved response rate), prospective studies are required to evaluate the overall outcome of treatment with different MIBG doses. Perhaps multiple medium-dose treatments (with cumulative doses up to 66.6 GBq) could provide an effective but less toxic alternative to high individual doses (97).

#### Combination with chemotherapy

Sisson *et al.* (86) suggested additive effects of combined [<sup>131</sup>I]MIBG treatment and subsequent 1-yr CVD chemotherapy in a study including six patients. Only one patient, who had a partial tumor response, completed the whole study protocol. A second patient received 9 months of chemotherapy after MIBG therapy and had a partial biochemical response but could not be evaluated radiologically for technical reasons. Three patients had progressive disease, one of whom did not finish MIBG treatment; another patient refused to return for chemotherapy. Altogether, a benefit of additional chemotherapy could not be demonstrated. Based on observations in one of six patients reported, Hartley *et al.* (87) proposed MIBG uptake might increase after a partial radiological response to chemotherapy. Although earlier experimental findings in neuroblastoma cell lines treated with doxorubicin and cisplatin (98) support this hypothesis to some extent, it has not been tested further in a clinical setting.

In summary, [<sup>131</sup>I]MIBG therapy remains regarded as a valuable option with low toxicity in malignant PCC. Application of a high radiation dose, as described above, appears

to increase both effectivity and toxicity with unknown impact on the overall outcome. Compared with CVD chemotherapy, published experience with MIBG is more extensive (Table 2) and implies at least equally long remissions among the responders, who represent 25–30% of the qualified patients. Overall, it is uncertain which of the two treatments possesses a higher initial response rate. However, patients who will definitely not benefit from [<sup>131</sup>I]MIBG because of insufficient uptake of the radiopharmaceutical can be identified in advance by diagnostic scintigraphy. Such patients are eligible for chemotherapy, as discussed earlier.

#### Somatostatin Analogs

In patients with endocrine tumors expressing somatostatin receptors, targeted treatment with analogs of the natural ligand can lead to marked biochemical and, in part, radiological improvements (99, 100). Octreotide and lanreotide are somatostatin-like oligopeptides that are widely employed in the therapy of somatotropin-secreting pituitary adenomas and neuroendocrine tumors of the gastroenteropancreatic system. These analogs in radiolabeled forms (usually [<sup>111</sup>In]pentetreotide) are also useful for somatostatin receptor imaging (SRI) (101). Many adrenal and extraadrenal PCCs are positive in SRI, and interestingly, this is often also true for MIBG-negative metastatic lesions (101–103), suggesting a possible therapeutic role for somatostatin analogs. However, data concerning this approach are scarce.

An immediate effect of octreotide on plasma norepinephrine levels could be shown in a study including six patients with chromaffin cell tumors (104). Octreotide was given iv for 2 h at a dose of 50 µg and led to a significant decrease of plasma norepinephrine by 50% during the infusion. Blood pressure remained unaltered in five patients and was lowered transiently in one. No sustained effects were noted. In a placebo-controlled crossover study, 10 patients with resectable PCC received three sc injections of either 100 µg octreotide or vehicle (105). There was no specific effect of octreotide on plasma or urinary catecholamine or neuropeptide Y levels, or on blood pressure, during the 24-h test interval.

**TABLE 2.** MIBG radiotherapy for malignant PCC (selected reports)

| Publication year (ref.)           | No. of patients  | Biochemical response (%) |                 | Tumor response (%) |         | Stable disease (%) | Progression (%) |
|-----------------------------------|------------------|--------------------------|-----------------|--------------------|---------|--------------------|-----------------|
|                                   |                  | Complete                 | Partial         | Complete           | Partial |                    |                 |
| 1997 (88) <sup>a</sup>            | 116 <sup>b</sup> | 13                       | 32              | 4                  | 26      | 57                 | 13              |
| 1999 (89) <sup>a</sup>            | 137 <sup>c</sup> | 43 <sup>d</sup>          | 43 <sup>d</sup> | 6                  | 18      | 55                 | 21              |
| 1999 (86)                         | 6                | 17                       | 17              | 0                  | 33      | 33                 | 33              |
| 2001 (87) <sup>e</sup>            | 6 <sup>f</sup>   | 0                        | 20              | 0                  | 0       | 67                 | 33              |
| 2003 (96) <sup>g</sup>            | 12 <sup>h</sup>  | 33                       | 50              | 18                 | 18      | 45                 | 18              |
| % of evaluable cases <sup>i</sup> |                  | 13                       | 32              | 4                  | 25      | 56                 | 15              |

The best response is listed irrespective of later relapse. Stable disease and progression refer to tumor presence only.

<sup>a</sup> Review of publications since 1983, additional report on three own patients in (88).

<sup>b</sup> Biochemical response evaluable in 96 patients.

<sup>c</sup> Includes patients from Ref. 88; biochemical response evaluable in 120 patients.

<sup>d</sup> No differentiation was made concerning complete and partial biochemical responses.

<sup>e</sup> First-line treatment in three patients, the other three receiving chemotherapy first (two CVD, one vincristine/ifosfamide/cisplatin).

<sup>f</sup> Biochemical response evaluable in five patients.

<sup>g</sup> High dose therapy (one to three treatments, cumulative dose 14.3–63.5 GBq).

<sup>h</sup> Includes two patients from Ref. 88; biochemical response evaluable in six, tumor response evaluable in 11 patients.

<sup>i</sup> Patients reported more than once were accounted for.

**TABLE 3.** Overview of different antineoplastic treatment options for malignant PCC

| Treatment modality                                   | Indications                                                                                 |                                                                                             | Effect                                                                                                                                  | Toxicity <sup>a,c</sup>                                                                       |
|------------------------------------------------------|---------------------------------------------------------------------------------------------|---------------------------------------------------------------------------------------------|-----------------------------------------------------------------------------------------------------------------------------------------|-----------------------------------------------------------------------------------------------|
|                                                      | For first-line use                                                                          | For second-line use                                                                         |                                                                                                                                         |                                                                                               |
| CVD chemotherapy                                     | Rapidly progressive disease                                                                 | Progressive disease                                                                         | Massive catecholamine release (catecholamine storm) after $\leq 48$ h                                                                   | Hospitalization for first cycle                                                               |
| MIBG radiotherapy (standard dose)                    | Slowly progressive disease with predominantly MIBG-accumulating lesions                     | Progressive disease with predominantly MIBG-accumulating lesions                            | Bone marrow suppression <sup>b</sup> after $\geq 10$ d<br>Hypothyroidism <sup>c</sup>                                                   | Ambulatory WBCs<br>Blockade of iodine uptake (with NaClO <sub>4</sub> and/or KI) <sup>c</sup> |
| MIBG radiotherapy (high dose)                        | As above, should be considered if MIBG-accumulating bone or soft tissue lesions are present | As above, should be considered if MIBG-accumulating bone or soft tissue lesions are present | Bone marrow suppression <sup>b</sup> after few weeks<br>Bone marrow suppression (severe thrombocytopenia and neutropenia) after 18–41 d | Ambulatory WBCs<br>Routine stem cell harvest, ambulatory WBCs                                 |
| Somatostatin analog therapy (including radiotherapy) | None                                                                                        | Progressive disease with SRI-positive lesions and failure of other modalities               | Renal failure (DOTATOC radiotherapy)<br>Gallstones (long-term treatment)                                                                | Fluid substitution, omit nephrotoxic medication                                               |

Sodium perchlorate (NaClO<sub>4</sub>, e.g. 300 mg thrice daily in adults), potassium iodide (KI, e.g. 130 mg once daily in adults). WBC, Whole blood count.

<sup>a</sup> Some typical effects that need special consideration are listed here. For other aspects of toxicity see main text.

<sup>b</sup> Usually thrombocytopenia.

<sup>c</sup> Applies to both standard- and high-dose therapy.

A single case of a male patient with a PCC whose hypertensive episodes could only be controlled with octreotide (300  $\mu$ g/d sc) was reported (106). A reduction of serum and urinary catecholamines was documented during octreotide treatment. It cannot be ruled out, however, that these clinical and biochemical improvements were due to spontaneous fluctuations of catecholamine release or to a placebo effect; little evidence supports the authors' conclusion that octreotide is useful in some patients with uncontrolled hypertension caused by a PCC.

Indeed, a more recent and well-designed trial strongly suggests that octreotide is ineffective in these tumors. Lamarre-Cliche *et al.* (107) treated 10 patients with malignant or recurrent PCC with slow-release im octreotide, 20 mg once monthly, and recorded clinical and biochemical markers of tumor activity before the first and 4 wk after the third injection. No changes in major parameters, particularly blood pressure, plasma catecholamine and chromogranin A concentrations, and metanephrine excretion, were noted. Symptoms remained equally unaffected. Because all patients had received SRI before octreotide administration, the authors could also show that these clinical and biochemical findings did not depend on the presence or absence of [<sup>111</sup>In]pentetreotide uptake.

The ineffectiveness of octreotide may be due to the expression of different somatostatin receptor (sst) subtypes in PCCs, of which only one, sst2a, binds standard somatostatin analogs with high affinity. In a large series of 52 PCCs from 35 patients, Mundschenk *et al.* (108) found positive immunohistochemical staining for sst2a in only 25% of the tumors, whereas sst3 was expressed in 90%. Other subtypes were even less frequent than sst2a. Among those patients who had received SRI before surgery, scintigraphy was true-positive if either sst2a or membrane-associated sst3 was present. In another study, not only was sst3 expression found in all of seven PCCs, but staining was also observed for more than 60% of the cells in each tumor (109). Whether a subgroup of SRI-positive patients may benefit from new somatostatin analogs with an improved affinity for sst3, such as SOM230 (110), remains to be elucidated.

Neuroendocrine tumors have also been targeted therapeutically with radiolabeled octreotide derivatives, such as [<sup>111</sup>In]pentetreotide and [<sup>90</sup>Y-DOTA]-D-Phe<sup>1</sup>-Tyr<sup>3</sup>-octreotide (<sup>90</sup>Y-DOTATOC) (111). Because few patients harboring a malignant PCC have been treated this way, data are not sufficient to evaluate this approach. Impaired renal function and bone marrow suppression are common side effects of [<sup>90</sup>Y]DOTATOC (112). Thus, compared with MIBG therapy, the lack of organ specificity and a considerable toxicity are disadvantageous.

### Conclusion and Perspectives

There is no generally effective systemic treatment with antineoplastic potential for malignant PCC. A considerable proportion of the patients respond to MIBG radiotherapy or to cytotoxic chemotherapy. However, because there are no published randomized controlled studies, it remains unclear whether these responses have an overall impact on survival or quality of life. Initial delay of disease progression might

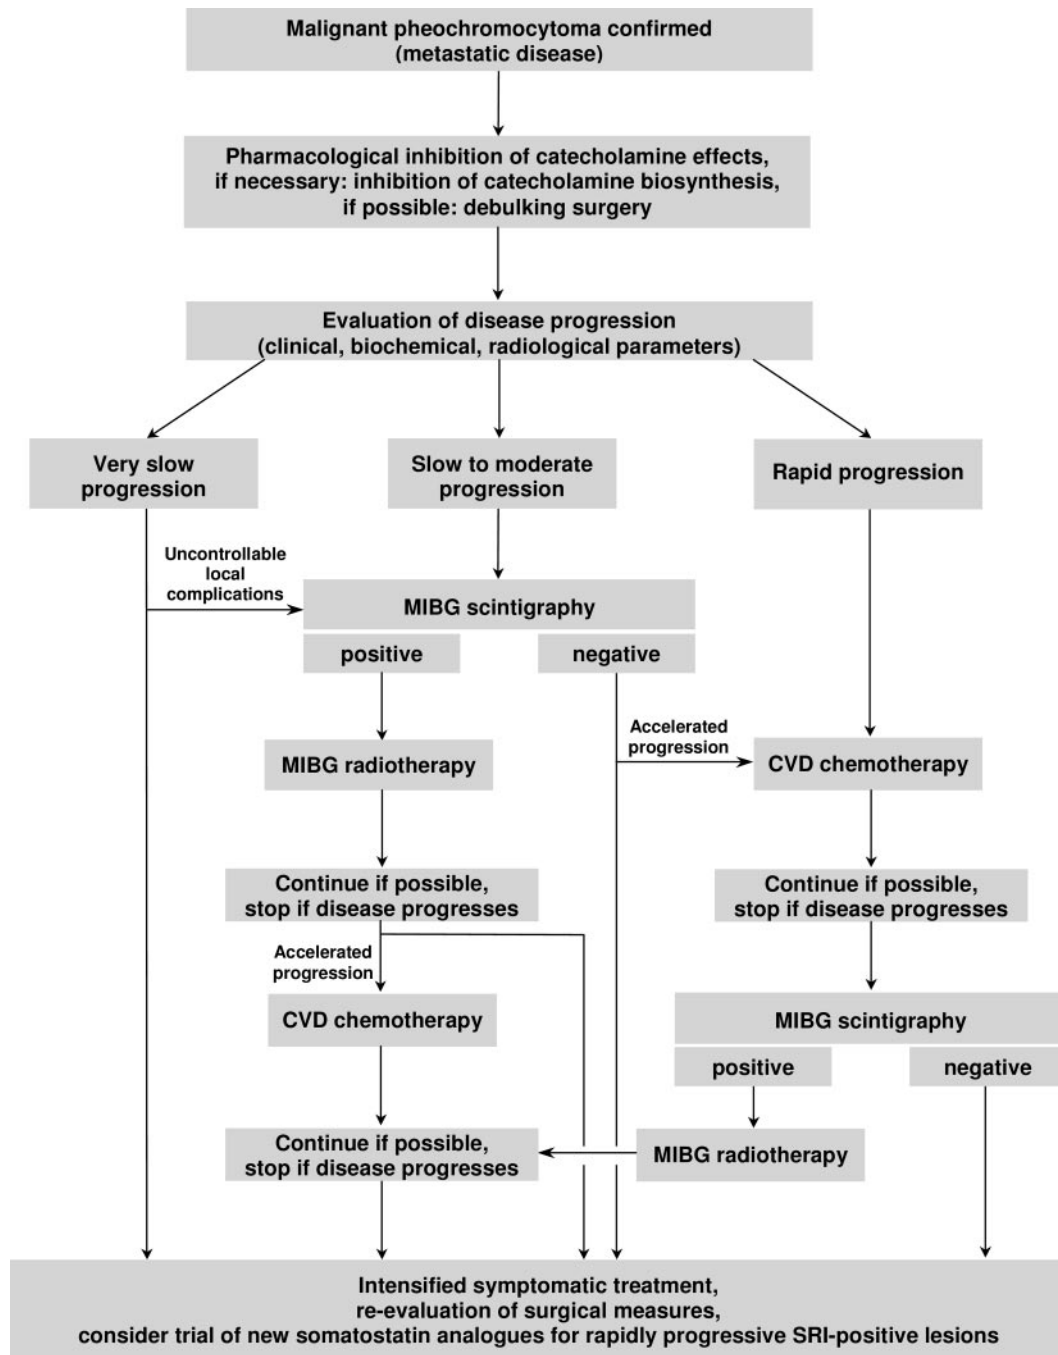

FIG. 2. Proposed algorithm for the treatment of metastatic pheochromocytoma.

be compensated by accelerated tumor spread after secondary failure of antineoplastic therapy, and side effects of the latter could outweigh symptomatic improvements related to reduced tumor burden (Table 3).

Although most patients with a malignant PCC experience rapid expansion of primary and metastatic tumor tissue, progression may be extremely slow in others, even after generalization of the neoplasm. Survival for 26 yr after diagnosis of bone metastases has been reported without antineoplastic treatment (113). Therefore, any present or new therapeutic approach must take into account the highly vari-

able natural course of the disease. It must be stressed that, due to the lack of evidence, a potentially harmful antineoplastic therapy is a particularly questionable option for those who have minimal symptoms and in whom long-term survival is likely (although there is no single parameter by which the extent of future tumor cell growth can be predicted, the combination of clinical, biochemical, histological, and radiological findings usually allows a preliminary estimate). Consequently, this subgroup of patients is infrequently treated by radio- or chemotherapy.

For the remaining majority of patients, suffering from ad-



vanced local and metastatic disease, informal algorithms concerning antineoplastic treatment have emerged with growing clinical experience (41). In rapidly progressive metastatic PCC, chemotherapy should be used as first-line therapy. Only the CVD scheme has been applied more than sporadically and is therefore the protocol of choice. If progression is slower, [<sup>131</sup>I]MIBG therapy has become the preferred approach for patients with a positive MIBG scan, because its effectivity and toxicity are more precisely known than for any other strategy, and both are acceptable. On the other hand, negative diagnostic scintigraphy predicts unresponsiveness to this treatment. Thus, MIBG administration can be omitted in these cases, and cytotoxic chemotherapy should instead be considered as the first-line therapy in cases of accelerated progression (Fig. 2). Currently, chemotherapy is also offered after primary or secondary failure of [<sup>131</sup>I]MIBG therapy, but little is known about its disease-limiting potential under these circumstances. MIBG radiotherapy should also be offered to patients with severe local complications of irresectable MIBG-accumulating tumors (such as large functional PGLs of the heart), even if progression is very slow and metastatic tumor burden low.

Future strategies may include some of the developments mentioned earlier, such as new chemotherapies, combinations of chemotherapy and [<sup>131</sup>I]MIBG therapy, increased doses of [<sup>131</sup>I]MIBG, radiotherapy with somatostatin analogs, or introduction of somatostatin analogs with enhanced binding to different receptor subtypes. Valuable information may also be drawn from treatment trials of neuroblastoma with MIBG or somatostatin analogs (114). In addition, new targets will be identified. Whether heat shock protein 90 (hsp90) is a promising candidate in this context remains to be elucidated. This molecular chaperone is overexpressed in malignant PCCs (38) and appears to serve as an important determinant of human telomerase reverse transcriptase (hTERT) expression, which is also enhanced in these tumors (37, 38). Inhibition of angiogenic pathways may also be an important element of multimodal concepts for therapy of malignant PCCs (35, 36, 115–117).

With the successful completion of the human genome project and the growing advance in genomic and proteomic research, our understanding of the basic mechanisms underlying the development and progression of both sporadic and familial malignant PCC will improve at increasing speed, probably leading to pathway-specific therapeutic strategies tailored to the individual biological background in each patient (40). Clearly, multicenter (and multinational) randomized trials are necessary to answer the questions connected with this expanding knowledge and to develop evidence-based standards to treat malignant pheochromocytoma more efficiently than previously possible.

### Acknowledgments

Received July 17, 2006. Accepted January 29, 2007.

Address all correspondence and requests for reprints to: Prof. Hendrik Lehnert, M.D., Chair of Medicine, Clinical Sciences Research Institute, Medical School Building, Gibbet Hill Campus, University of Warwick, Coventry CV4 7AL, United Kingdom. E-mail: H.Lehnert@warwick.ac.uk.

Disclosure Statement: The authors have nothing to disclose.

### References

- Lenders JW, Eisenhofer G, Mannelli M, Pacak K 2005 Pheochromocytoma. *Lancet* 366:665–675
- McNeil AR, Blok BH, Koelmeyer TD, Burke MP, Hilton JM 2000 Pheochromocytomas discovered during coronal autopsies in Sydney, Melbourne and Auckland. *Aust NZ J Med* 30:648–652
- Lo CY, Lam KY, Wat MS, Lam KS 2000 Adrenal pheochromocytoma remains a frequently overlooked diagnosis. *Am J Surg* 179:212–215
- Sutton MG, Sheps SG, Lie JT 1981 Prevalence of clinically unsuspected pheochromocytoma. Review of a 50-year autopsy series. *Mayo Clin Proc* 56:354–360
- Beard CM, Sheps SG, Kurland LT, Carney JA, Lie JT 1983 Occurrence of pheochromocytoma in Rochester, Minnesota, 1950 through 1979. *Mayo Clin Proc* 58:802–804
- Stenstrom G, Svardsudd K 1986 Pheochromocytoma in Sweden 1958–1981. An analysis of the National Cancer Registry Data. *Acta Med Scand* 220:225–232
- Hartley L, Perry-Keene D 1985 Pheochromocytoma in Queensland 1970–83. *Aust NZ J Surg* 55:471–475
- Andersen GS, Toftdahl DB, Lund JO, Strandgaard S, Nielsen PE 1988 The incidence rate of pheochromocytoma and Conn's syndrome in Denmark, 1977–1981. *J Hum Hypertens* 2:187–189
- Fernandez-Calvet L, Garcia-Mayor RV 1994 Incidence of pheochromocytoma in South Galicia, Spain. *J Intern Med* 236:675–677
- Neumann HP, Bausch B, McWhinney SR, Bender BU, Gimm O, Franke G, Schipper J, Klisch J, Althoefer C, Zerres K, Januszewicz A, Eng C, Smith WM, Munk R, Manz T, Glaesker S, Apel TW, Treier M, Reineke M, Walz MK, Hoang-Vu C, Brauckhoff M, Klein-Franke A, Klose P, Schmidt H, Maier-Woelfle M, Peczkowska M, Szmigielski C, Eng C 2002 Germ-line mutations in nonsyndromic pheochromocytoma. *N Engl J Med* 346:1459–1466
- Amar L, Bertherat J, Baudin E, Ajzenberg C, Bressac-de Paillerets B, Chabre O, Chamontin B, Delemer B, Giraud S, Murat A, Niccoli-Sire P, Richard S, Rohmer V, Sadoul JL, Strompf L, Schlumberger M, Bertagna X, Plouin PF, Jeunemaitre X, Gimenez-Roqueplo AP 2005 Genetic testing in pheochromocytoma or functional paraganglioma. *J Clin Oncol* 23:8812–8818
- Gimm O, Koch CA, Januszewicz A, Opocher G, Neumann HP 2004 The genetic basis of pheochromocytoma. *Front Horm Res* 31:45–60
- Favier J, Briere JJ, Strompf L, Amar L, Filali M, Jeunemaitre X, Rustin P, Gimenez-Roqueplo AP 2005 Hereditary paraganglioma/pheochromocytoma and inherited succinate dehydrogenase deficiency. *Horm Res* 63:171–179
- Amar L, Servais A, Gimenez-Roqueplo AP, Zinzindohoue F, Chatellier G, Plouin PF 2005 Year of diagnosis, features at presentation, and risk of recurrence in patients with pheochromocytoma or secreting paraganglioma. *J Clin Endocrinol Metab* 90:2110–2116
- Gimenez-Roqueplo AP, Favier J, Rustin P, Rieubland C, Crespin M, Nau V, Khau VK, Corvol P, Plouin PF, Jeunemaitre X 2003 Mutations in the SDHB gene are associated with extra-adrenal and/or malignant pheochromocytomas. *Cancer Res* 63:5615–5621
- Neumann HP, Pawlu C, Peczkowska M, Bausch B, McWhinney SR, Muresan M, Buchta M, Franke G, Klisch J, Bley TA, Hoegerle S, Boedeker CC, Opocher G, Schipper J, Januszewicz A, Eng C 2004 Distinct clinical features of paraganglioma syndromes associated with SDHB and SDHD gene mutations. *JAMA* 292:943–951
- Benn DE, Gimenez-Roqueplo AP, Reilly JR, Bertherat J, Burgess J, Byth K, Croxson M, Dahia PL, Elston M, Gimm O, Henley D, Herman P, Murday V, Niccoli-Sire P, Pasiaka JL, Rohmer V, Tucker K, Jeunemaitre X, Marsh DJ, Plouin PF, Robinson BG 2006 Clinical presentation and penetrance of pheochromocytoma/paraganglioma syndromes. *J Clin Endocrinol Metab* 91:827–836
- Modigliani E, Vasen HM, Raue K, Dralle H, Frilling A, Gheri RG, Brandi ML, Limbert E, Niederle B, Forgas L 1995 Pheochromocytoma in multiple endocrine neoplasia type 2: European study. The Euromen Study Group. *J Intern Med* 238:363–367
- Frank-Raue K, Kratt T, Hoppner W, Buhr H, Ziegler R, Raue F 1996 Diagnosis and management of pheochromocytomas in patients with multiple endocrine neoplasia type 2-relevance of specific mutations in the RET proto-oncogene. *Eur J Endocrinol* 135:222–225
- Walther MM, Reiter R, Keiser HR, Choyke PL, Venzon D, Hurley K, Gnarr JR, Reynolds JC, Glenn GM, Zbar B, Linehan WM 1999 Clinical and genetic characterization of pheochromocytoma in von Hippel-Lindau families: comparison with sporadic pheochromocytoma gives insight into natural history of pheochromocytoma. *J Urol* 162:659–664
- Opocher G, Conton P, Schiavi F, Macino B, Mantero F 2005 Pheochromocytoma in von Hippel-Lindau disease and neurofibromatosis type 1. *Fam Cancer* 4:13–16
- Whalen RK, Althausen AF, Daniels GH 1992 Extra-adrenal pheochromocytoma. *J Urol* 147:1–10
- O'Riordain DS, Young Jr WF, Grant CS, Carney JA, van Heerden JA 1996

- Clinical spectrum and outcome of functional extraadrenal paraganglioma. *World J Surg* 20:916–921
24. Mannelli M, Ianni L, Cilotti A, Conti A 1999 Pheochromocytoma in Italy: a multicentric retrospective study. *Eur J Endocrinol* 141:619–624
  25. John H, Ziegler WH, Hauri D, Jaeger P 1999 Pheochromocytomas: can malignant potential be predicted? *Urology* 53:679–683
  26. Edström Elder E, Hjelm Skog AL, Hoog A, Hamberger B 2003 The management of benign and malignant pheochromocytoma and abdominal paraganglioma. *Eur J Surg Oncol* 29:278–283
  27. Goldstein RE, O'Neill Jr JA, Holcomb III GW, Morgan III WM, Neblett III WW, Oates JA, Brown N, Nadeau J, Smith B, Page DL, Abumrad NN, Scott Jr HW 1999 Clinical experience over 48 years with pheochromocytoma. *Ann Surg* 229:755–764
  28. Januszewicz W, Wocial B, Januszewicz A, Gryglas P, Prejbisz A 2001 Dopamine and dopa urinary excretion in patients with pheochromocytoma: diagnostic implications. *Blood Press* 10:212–216
  29. van der Harst E, de Herder WW, de Krijger RR, Bruining HA, Bonjer HJ, Lamberts SW, van den Meiracker AH, Stijnen TH, Boomsma F 2002 The value of plasma markers for the clinical behaviour of pheochromocytomas. *Eur J Endocrinol* 147:85–94
  30. Rao F, Keiser HR, O'Connor DT 2002 Malignant and benign pheochromocytoma: chromaffin granule transmitters and the response to medical and surgical treatment. *Ann NY Acad Sci* 971:530–532
  31. Shen WT, Sturgeon C, Clark OH, Duh QY, Kebebew E 2004 Should pheochromocytoma size influence surgical approach? A comparison of 90 malignant and 60 benign pheochromocytomas. *Surgery* 136:1129–1137
  32. Koch CA, Vortmeyer AO, Diallo R, Poremba C, Giordano TJ, Sanders D, Bornstein SR, Chrousos GP, Pacak K 2002 Survivin: a novel neuroendocrine marker for pheochromocytoma. *Eur J Endocrinol* 146:381–388
  33. Thompson LD 2002 Pheochromocytoma of the adrenal gland scaled score (PASS) to separate benign from malignant neoplasms: a clinicopathologic and immunophenotypic study of 100 cases. *Am J Surg Pathol* 26:551–566
  34. Scott Jr HW, Halter SA 1984 Oncologic aspects of pheochromocytoma: the importance of follow-up. *Surgery* 96:1061–1066
  35. Salmenkivi K, Haglund C, Ristimäki A, Arola J, Heikkilä P 2001 Increased expression of cyclooxygenase-2 in malignant pheochromocytomas. *J Clin Endocrinol Metab* 86:5615–5619
  36. Favier J, Plouin PF, Corvol P, Gasc JM 2002 Angiogenesis and vascular architecture in pheochromocytomas: distinctive traits in malignant tumors. *Am J Pathol* 161:1235–1246
  37. Edström Elder E, Xu D, Hoog A, Enberg U, Hou M, Pisa P, Gruber A, Larsson C, Backdahl M 2003 Ki-67 and hTERT expression can aid in the distinction between malignant and benign pheochromocytoma and paraganglioma. *Mod Pathol* 16:246–255
  38. Boltze C, Mundschenk J, Unger N, Schneider-Stock R, Peters B, Mawrin C, Hoang-Vu C, Roessner A, Lehnert H 2003 Expression profile of the telomeric complex discriminates between benign and malignant pheochromocytoma. *J Clin Endocrinol Metab* 88:4280–4286
  39. Yon L, Guillemot J, Montero-Hadjadje M, Grumolato L, Leprince J, Lefebvre H, Contesse V, Plouin PF, Vaudroy J, Anouar Y 2003 Identification of the secretogranin II-derived peptide EM66 in pheochromocytomas as a potential marker for discriminating benign versus malignant tumors. *J Clin Endocrinol Metab* 88:2579–2585
  40. Eisenhofer G, Bornstein SR, Brouwers FM, Cheung NK, Dahia PL, de Krijger RR, Giordano TJ, Greene LA, Goldstein DS, Lehnert H, Manger WM, Maris JM, Neumann HP, Pacak K, Shulkun BL, Smith DJ, Tischler AS, Young Jr WF 2004 Malignant pheochromocytoma: current status and initiatives for future progress. *Endocr Relat Cancer* 11:423–436
  41. Lehnert H, Mundschenk J, Hahn K 2004 Malignant pheochromocytoma. *Front Horm Res* 31:155–162
  42. Bravo EL 1994 Evolving concepts in the pathophysiology, diagnosis, and treatment of pheochromocytoma. *Endocr Rev* 15:356–368
  43. Schlumberger M, Gicquel C, Lumbroso J, Tenenbaum F, Comoy E, Bosq J, Fonseca E, Ghillani PP, Aubert B, Travagli JP 1992 Malignant pheochromocytoma: clinical, biological, histologic and therapeutic data in a series of 20 patients with distant metastases. *J Endocrinol Invest* 15:631–642
  44. Tada K, Okuda Y, Yamashita K 1998 Three cases of malignant pheochromocytoma treated with cyclophosphamide, vincristine, and dacarbazine combination chemotherapy and  $\alpha$ -methyl-*p*-tyrosine to control hypercatecholaminemia. *Horm Res* 49:295–297
  45. Miller AB, Hoogstraten B, Staquet M, Winkler A 1981 Reporting results of cancer treatment. *Cancer* 47:207–214
  46. Eisenhofer G, Lenders JW, Goldstein DS, Mannelli M, Csako G, Walther MM, Brouwers FM, Pacak K 2005 Pheochromocytoma catecholamine phenotypes and prediction of tumor size and location by use of plasma free metanephrines. *Clin Chem* 51:735–744
  47. Hamilton BP, Cheikh IE, Rivera LE 1977 Attempted treatment of inoperable pheochromocytoma with streptozocin. *Arch Intern Med* 137:762–765
  48. Feldman JM 1983 Treatment of metastatic pheochromocytoma with streptozocin. *Arch Intern Med* 143:1799–1800
  49. Herrera LO, Hossain ZM, Rafal HS, Frelick RW, Ashley PF, Lopez GE 1980 Malignant pheochromocytoma (paraganglioma) of the organ of Zuckerkandl: a study of two cases. *J Surg Oncol* 14:133–145
  50. Bukowski RM, Vidt DG 1984 Chemotherapy trials in malignant pheochromocytoma: report of two patients and review of the literature. *J Surg Oncol* 27:89–92
  51. Keiser HR, Goldstein DS, Wade JL, Douglas FL, Averbuch SD 1985 Treatment of malignant pheochromocytoma with combination chemotherapy. *Hypertension* 7:118–124
  52. Averbuch SD, Steakley CS, Young RC, Gelmann EP, Goldstein DS, Stull R, Keiser HR 1988 Malignant pheochromocytoma: effective treatment with a combination of cyclophosphamide, vincristine, and dacarbazine. *Ann Intern Med* 109:267–273
  53. Siddiqui MZ, Von Eyben FE, Spanos G 1988 High-voltage irradiation and combination chemotherapy for malignant pheochromocytoma. *Cancer* 62:686–690
  54. Sasaki M, Iwaoka T, Yamauchi J, Tokunaga H, Naomi S, Inoue J, Oishi S, Umeda T, Sato T 1994 A case of Sipple's syndrome with malignant pheochromocytoma treated with  $^{131}\text{I}$ -metaiodobenzyl guanidine and a combined chemotherapy with cyclophosphamide, vincristine and dacarbazine. *Endocr J* 41:155–160
  55. Noshiro T, Honma H, Shimizu K, Kusakari T, Watanabe T, Akama H, Shibukawa S, Miura W, Abe K, Miura Y 1996 Two cases of malignant pheochromocytoma treated with cyclophosphamide, vincristine and dacarbazine in a combined chemotherapy. *Endocr J* 43:279–284
  56. Tato A, Orte L, Diz P, Quereda C, Ortuno J 1997 Malignant pheochromocytoma, still a therapeutic challenge. *Am J Hypertens* 10:479–481
  57. Srimuninimit V, Wampler GL 1991 Case report of metastatic familial pheochromocytoma treated with cisplatin and 5-fluorouracil. *Cancer Chemother Pharmacol* 28:217–219
  58. Jirari A, Charpentier A, Popescu S, Boidin P, Eisenmann B 1999 A malignant primary cardiac pheochromocytoma. *Ann Thorac Surg* 68:565–566
  59. Nakane M, Takahashi S, Sekine I, Fukui I, Koizumi M, Kage K, Ito Y, Aiba K, Horikoshi N, Hatake K, Ishikawa Y, Ogata E 2003 Successful treatment of malignant pheochromocytoma with combination chemotherapy containing anthracycline. *Ann Oncol* 14:1449–1451
  60. Kulke MH, Stuart K, Enzinger PC, Ryan DP, Clark JW, Muzikansky A, Vincitore M, Michelini A, Fuchs CS 2006 Phase II study of temozolomide and thalidomide in patients with metastatic neuroendocrine tumors. *J Clin Oncol* 24:401–406
  61. Jaques Jr S, Tobes MC, Sisson JC 1987 Sodium dependency of uptake of norepinephrine and *m*-iodobenzylguanidine into cultured human pheochromocytoma cells: evidence for uptake-one. *Cancer Res* 47:3920–3928
  62. Sisson JC, Shapiro B, Beierwaltes WH, Nakajo M, Glowniak J, Mangner T, Carey JE, Swanson DP, Copp J, Satterlee W 1983 Treatment of malignant pheochromocytoma with a new radiopharmaceutical. *Trans Assoc Am Physicians* 96:209–217
  63. Sisson JC, Shapiro B, Beierwaltes WH, Glowniak JV, Nakajo M, Mangner TJ, Carey JE, Swanson DP, Copp JE, Satterlee WG 1984 Radiopharmaceutical treatment of malignant pheochromocytoma. *J Nucl Med* 25:197–206
  64. Vetter H, Fischer M, Muller-Rensing R, Vetter W, Winterberg B 1983  $^{131}\text{I}$ -meta-iodobenzylguanidine in treatment of malignant pheochromocytomas. *Lancet* 2:107
  65. Hoefnagel CA, Voute PA, de Kraker J, Marcuse HR 1987 Radionuclide diagnosis and therapy of neural crest tumors using iodine-131 metaiodobenzylguanidine. *J Nucl Med* 28:308–314
  66. Voute PA, Hoefnagel CA, de Kraker J, Evans AE, Hayes A, Green A 1987 Radionuclide therapy of neural crest tumors. *Med Pediatr Oncol* 15:192–195
  67. Limone P, Pogliano G, Castellano G, Argiro G, Isaia GC, Favero A, Cottino F, Rizzi G, Molinatti GM 1988  $^{131}\text{I}$ -meta-iodobenzylguanidine for the diagnosis and treatment of pheochromocytoma. *Panminerva Med* 30:169–172
  68. Theilade K, Bak M, Olsen K, Nielsen SL, Christensen NJ 1988 A case of malignant pheochromocytoma treated by  $^{131}\text{I}$ -metaiodobenzylguanidine. *Acta Oncol* 27:296–297
  69. Guo JZ, Gong LS, Chen SX, Luo BY, Xu MY 1989 Malignant pheochromocytoma: diagnosis and treatment in fifteen cases. *J Hypertens* 7:261–266
  70. Goncalves E, Ninane J, Wese FX, Leonet J, Piret L, Cornu G, De Meyer R 1990 Familial pheochromocytoma: successful treatment with  $^{131}\text{I}$ -MIBG. *Med Pediatr Oncol* 18:126–130
  71. Konings JE, Bruning PF, Abeling NG, van Gennip AH, Hoefnagel CA 1990 Diagnosis and treatment of malignant pheochromocytoma with  $^{131}\text{I}$ -metaiodobenzylguanidine: a case report. *Radiother Oncol* 17:103–108
  72. Nakagami Y, Nomura K, Kusakabe K, Miko N, Tsumura T, Demura H 1990 A case of malignant pheochromocytoma treated with  $^{131}\text{I}$ -metaiodobenzylguanidine and  $\alpha$ -methyl-*p*-tyrosine. *Jpn J Med* 29:329–333
  73. Bestagno M, Pizzocaro C, Maira G, Terzi A, Panarotto MB, Guerra P 1991 Results of  $^{131}\text{I}$ -metaiodobenzylguanidine treatment in metastatic malignant pheochromocytoma. *J Nucl Biol Med* 35:277–279
  74. Colombo L, Lomuscio G, Vignati A, Dottorini ME 1991 Preliminary results of  $^{131}\text{I}$ -metaiodobenzylguanidine treatment in metastatic malignant pheochromocytoma. *J Nucl Biol Med* 35:300–304
  75. Fischer M 1991 Therapy of pheochromocytoma with  $^{131}\text{I}$ -metaiodobenzylguanidine. *J Nucl Biol Med* 35:292–294



76. Khafagi FA, Shapiro B, Fischer M, Sisson JC, Hutchinson R, Beierwaltes WH 1991 Pheochromocytoma and functioning paraganglioma in childhood and adolescence: role of iodine 131 metaiodobenzylguanidine. *Eur J Nucl Med* 18:191–198
77. Krempf M, Lumbroso J, Mornex R, Brendel AJ, Wemeau JL, Delisle MJ, Aubert B, Carpentier P, Fleury-Goyon MC, Gibold C 1991 Use of  $m$ - $^{131}\text{I}$ iodobenzylguanidine in the treatment of malignant pheochromocytoma. *J Clin Endocrinol Metab* 72:455–461
78. Lewington VJ, Zivanovic MA, Tristram M, McEwan AJ, Ackery DM 1991 Radiolabelled metaiodobenzylguanidine targeted radiotherapy for malignant pheochromocytoma. *J Nucl Biol Med* 35:280–283
79. Lumbroso J, Schlumberger M, Tenenbaum F, Aubert B, Travagli JP, Parmentier C 1991  $^{131}\text{I}$ Metaiodobenzylguanidine therapy in 20 patients with malignant pheochromocytoma. *J Nucl Biol Med* 35:288–291
80. Schwartz C, Gibold C, Vuillemin B, Delisle MJ 1991 Results of  $^{131}\text{I}$ metaiodobenzylguanidine therapy administered to three patients with malignant pheochromocytoma. *J Nucl Biol Med* 35:305–307
81. Shapiro B, Sisson JC, Wieland DM, Mangner TJ, Zempel SM, Mudgett E, Gross MD, Carey JE, Zasady KR, Beierwaltes WH 1991 Radiopharmaceutical therapy of malignant pheochromocytoma with  $^{131}\text{I}$ metaiodobenzylguanidine: results from ten years of experience. *J Nucl Biol Med* 35:269–276
82. Troncone L, Rufini V, Daidone MS, De Santis M, Luzzi S 1991  $^{131}\text{I}$ Metaiodobenzylguanidine treatment of malignant pheochromocytoma: experience of the Rome group. *J Nucl Biol Med* 35:295–299
83. Bomanji J, Britton KE, Ur E, Hawkins L, Grossman AB, Besser GM 1993 Treatment of malignant pheochromocytoma, paraganglioma and carcinoid tumours with  $^{131}\text{I}$ -metaiodobenzylguanidine. *Nucl Med Commun* 14:856–861
84. Sakahara H, Endo K, Saga T, Hosono M, Kobayashi H, Konishi J 1994  $^{131}\text{I}$ -metaiodobenzylguanidine therapy for malignant pheochromocytoma. *Ann Nucl Med* 8:133–137
85. Pujol P, Bringer J, Faurous P, Jaffiol C 1995 Metastatic pheochromocytoma with a long-term response after iodine-131 metaiodobenzylguanidine therapy. *Eur J Nucl Med* 22:382–384
86. Sisson JC, Shapiro B, Shulkin BL, Urba S, Zempel S, Spaulding S 1999 Treatment of malignant pheochromocytomas with  $^{131}\text{I}$  metaiodobenzylguanidine and chemotherapy. *Am J Clin Oncol* 22:364–370
87. Hartley A, Spooner D, Brunt AM 2001 Management of malignant pheochromocytoma: a retrospective review of the use of MIBG and chemotherapy in the West Midlands. *Clin Oncol (R Coll Radiol)* 13:361–366
88. Loh KC, Fitzgerald PA, Matthey KK, Yeo PP, Price DC 1997 The treatment of malignant pheochromocytoma with iodine-131 metaiodobenzylguanidine ( $^{131}\text{I}$ -MIBG): a comprehensive review of 116 reported patients. *J Endocrinol Invest* 20:648–658
89. Troncone L, Rufini V 1999 Nuclear medicine therapy of pheochromocytoma and paraganglioma. *Q J Nucl Med* 43:344–355
90. Sisson JC 2002 Radiopharmaceutical treatment of pheochromocytoma. *Ann NY Acad Sci* 970:54–60
91. Garaventa A, Gambini C, Villavecchia G, Di Cataldo A, Bertolazzi L, Pizzitola MR, De Bernardi B, Haupt R 2003 Second malignancies in children with neuroblastoma after combined treatment with  $^{131}\text{I}$ -metaiodobenzylguanidine. *Cancer* 97:1332–1338
92. Leung A, Shapiro B, Hattner R, Kim E, de Kraker J, Ghazzar N, Hartmann O, Hoefnagel CA, Jamadar DA, Kloos R, Lizotte P, Lumbroso J, Rufini V, Shulkin BL, Sisson JC, Thein A, Troncone L 1997 Specificity of radioiodinated MIBG for neural crest tumors in childhood. *J Nucl Med* 38:1352–1357
93. Glowinski J, Kilty JE, Amara SG, Hoffman BJ, Turner FE 1993 Evaluation of metaiodobenzylguanidine uptake by the norepinephrine, dopamine and serotonin transporters. *J Nucl Med* 34:1140–1146
94. Solanki KK, Bomanji J, Moyes J, Mather SJ, Trainer PJ, Britton KE 1992 A pharmacological guide to medicines which interfere with the biodistribution of radiolabelled  $meta$ -iodobenzylguanidine (MIBG). *Nucl Med Commun* 13:513–521
95. Khafagi FA, Shapiro B, Fig LM, Mallette S, Sisson JC 1989 Labetalol reduces iodine-131 MIBG uptake by pheochromocytoma and normal tissues. *J Nucl Med* 30:481–489
96. Rose B, Matthey KK, Price D, Huberty J, Klencke B, Norton JA, Fitzgerald PA 2003 High-dose  $^{131}\text{I}$ -metaiodobenzylguanidine therapy for 12 patients with malignant pheochromocytoma. *Cancer* 98:239–248
97. Lam MG, Lips CJ, Jager PL, Dullaart RP, Lentjes EG, van Rijk PP, de Klerk JM 2005 Repeated  $^{131}\text{I}$ metaiodobenzylguanidine therapy in two patients with malignant pheochromocytoma. *J Clin Endocrinol Metab* 90:5888–5895
98. Mecco D, Lasorella A, Riccardi A, Servidei T, Mastrangelo R, Riccardi R 1999 Influence of cisplatin and doxorubicin on  $^{125}\text{I}$ - $meta$ -iodobenzylguanidine uptake in human neuroblastoma cell lines. *Eur J Cancer* 35:1227–1234
99. Ricci S, Antonuzzo A, Galli L, Orlandini C, Ferdeghini M, Boni G, Roncella M, Mosca F, Conte PF 2000 Long-acting depot lanreotide in the treatment of patients with advanced neuroendocrine tumors. *Am J Clin Oncol* 23:412–415
100. Ayuk J, Stewart SE, Stewart PM, Sheppard MC 2004 Efficacy of Sandostatin LAR (long-acting somatostatin analogue) is similar in patients with untreated acromegaly and in those previously treated with surgery and/or radiotherapy. *Clin Endocrinol (Oxf)* 60:375–381
101. Kaltsas G, Korbonits M, Heintz E, Mukherjee JJ, Jenkins PJ, Chew SL, Rezek R, Monson JP, Besser GM, Foley R, Britton KE, Grossman AB 2001 Comparison of somatostatin analog and  $meta$ -iodobenzylguanidine radionuclides in the diagnosis and localization of advanced neuroendocrine tumors. *J Clin Endocrinol Metab* 86:895–902
102. Kopf D, Bockisch A, Steinert H, Hahn K, Beyer J, Neumann HP, Hensen J, Lehnert H 1997 Octreotide scintigraphy and catecholamine response to an octreotide challenge in malignant pheochromocytoma. *Clin Endocrinol (Oxf)* 46:39–44
103. van der Harst E, de Herder WW, Bruining HA, Bonjer HJ, de Krijger RR, Lamberts SW, van de Meiracker AH, Boomsma F, Stijnen T, Krenning EP, Bosman FT, Kwakkeboom DJ 2001  $^{123}\text{I}$ Metaiodobenzylguanidine and  $^{111}\text{In}$ octreotide uptake in benign and malignant pheochromocytomas. *J Clin Endocrinol Metab* 86:685–693
104. Invitti C, De M, I, Bolla GB, Pecori GF, Maestri E, Leonetti G, Cavagnini F 1993 Effect of octreotide on catecholamine plasma levels in patients with chromaffin cell tumors. *Horm Res* 40:156–160
105. Plouin PF, Bertherat J, Chatellier G, Billaud E, Azizi M, Grouzmann E, Epelbaum J 1995 Short-term effects of octreotide on blood pressure and plasma catecholamines and neuropeptide Y levels in patients with pheochromocytoma: a placebo-controlled trial. *Clin Endocrinol (Oxf)* 42:289–294
106. Koriyama N, Kakei M, Yaekura K, Okui H, Yamashita T, Nishimura H, Matsushita S, Tei C 2000 Control of catecholamine release and blood pressure with octreotide in a patient with pheochromocytoma: a case report with in vitro studies. *Horm Res* 53:46–50
107. Lamarre-Cliche M, Gimenez-Roqueplo AP, Billaud E, Baudin E, Luton JP, Plouin PF 2002 Effects of slow-release octreotide on urinary metanephrine excretion and plasma chromogranin A and catecholamine levels in patients with malignant or recurrent pheochromocytoma. *Clin Endocrinol (Oxf)* 57:629–634
108. Mundschenk J, Unger N, Schulz S, Holtt V, Schulz S, Steinke R, Lehnert H 2003 Somatostatin receptor subtypes in human pheochromocytoma: subcellular expression pattern and functional relevance for octreotide scintigraphy. *J Clin Endocrinol Metab* 88:5150–5157
109. Unger N, Serdiuk I, Sheu SY, Walz MK, Schulz S, Schmid KW, Mann K, Petersenn S 2004 Immunohistochemical determination of somatostatin receptor subtypes 1, 2A, 3, 4, and 5 in various adrenal tumors. *Endocr Res* 30:931–934
110. Bruns C, Lewis I, Briner U, Meno-Tetang G, Weckbecker G 2002 SOM230: a novel somatostatin peptidomimetic with broad somatotropin release inhibiting factor (SRIF) receptor binding and a unique antisecretory profile. *Eur J Endocrinol* 146:707–716
111. Förster GJ, Engelbach MJ, Brockmann JJ, Reber HJ, Buchholz HG, Macke HR, Rosch FR, Herzog HR, Bartenstein PR 2001 Preliminary data on biodistribution and dosimetry for therapy planning of somatostatin receptor positive tumours: comparison of  $^{86}\text{Y}$ -DOTATOC and  $^{111}\text{In}$ -DTPA-octreotide. *Eur J Nucl Med* 28:1743–1750
112. Bodei L, Cremonesi M, Zoboli S, Grana C, Bartolomei M, Rocca P, Caracciolo M, Macke HR, Chinol M, Paganelli G 2003 Receptor-mediated radionuclide therapy with  $^{90}\text{Y}$ -DOTATOC in association with amino acid infusion: a phase I study. *Eur J Nucl Med Mol Imaging* 30:207–216
113. Yoshida S, Hatori M, Noshiro T, Kimura N, Kokubun S 2001 Twenty-six-years' survival with multiple bone metastasis of malignant pheochromocytoma. *Arch Orthop Trauma Surg* 121:598–600
114. Pashankar FD, O'Dorisio MS, Menda Y 2005 MIBG and somatostatin receptor analogs in children: current concepts on diagnostic and therapeutic use. *J Nucl Med* 46:555–615
115. Zielke A, Middeke M, Hoffmann S, Colombo-Benkmann M, Barth P, Hassan I, Wunderlich A, Hofbauer LC, Duh QQ 2002 VEGF-mediated angiogenesis of human pheochromocytomas is associated to malignancy and inhibited by anti-VEGF antibodies in experimental tumors. *Surgery* 132:1056–1063
116. Salmenkivi K, Heikkila P, Liu J, Haglund C, Arola J 2003 VEGF in 105 pheochromocytomas: enhanced expression correlates with malignant outcome. *APMIS* 111:458–464
117. Morabito A, De Maio E, Di Maio M, Normanno N, Perrone F 2006 Tyrosine kinase inhibitors of vascular endothelial growth factor receptors in clinical trials: current status and future directions. *Oncologist* 11:753–764
